# Supplementary material for: Comparative Characterization of Key Volatile Compounds in Slow- and Fast-Growing Duck Raw Meat Based on Widely Targeted Metabolomics
Source: MDPI journal article supplement (doi:10.3390/foods11243975), 2022-12-08
Supplement: s1 [file s1]

**Table S1.** Ingredient and nutrient levels of the commercial diets in ducks (1~65 d).

| Item                          | 1~21 d | 22~65 d |
|-------------------------------|--------|---------|
| Ingredients, %                |        |         |
| Corn                          | 56.00  | 74.10   |
| Soybean meal                  | 27.50  | 18.40   |
| Wheat meal                    | 10.00  | 0.87    |
| Fish meal                     | 5.00   | 5.50    |
| Limestone                     | 1.00   | 0.70    |
| Salt                          | 0.24   | 0.24    |
| DL-Methionine                 | 0.16   | 0.09    |
| Vitamin and trace mineral mix | 0.10   | 0.10    |
| Nutrient levels               |        |         |
| Apparent ME, KJ/ kg           | 12.34  | 12.97   |
| CP, %                         | 22.00  | 18.00   |
| Lys, %                        | 1.23   | 0.94    |
| Met, %                        | 0.52   | 0.40    |
| Trp, %                        | 0.29   | 0.23    |
| Thr, %                        | 0.91   | 0.76    |
| Ca, %                         | 0.87   | 0.75    |
| Total P, %                    | 0.41   | 0.39    |
| Sulphur-amino acid, %         | 0.85   | 0.66    |

Note: Vitamin and trace mineral mix supplied the following per kilogram of total diet: Cu ( $\text{CuSO}_4 \cdot 5\text{H}_2\text{O}$ ), 10 mg; Fe ( $\text{FeSO}_4 \cdot 7\text{H}_2\text{O}$ ), 60 mg; Zn ( $\text{ZnO}$ ), 60 mg; Mn ( $\text{MnSO}_4 \cdot \text{H}_2\text{O}$ ), 80 mg; Se ( $\text{NaSeO}_3$ ), 0.3 mg; I (KI), 0.2 mg; choline chloride, 750 mg; vitamin A (retinyl acetate), 8,000 IU; vitamin D<sub>3</sub> (Cholcalciferol), 3,000 IU; vitamin E (DL- $\alpha$ -tocopheryl acetate), 20 IU; vitamin K<sub>3</sub> (menadione sodium bisulphate), 2 mg; thiamin (thiamin mononitrate), 1.5 mg; riboflavin, 4 mg; pyridoxine hydrochloride, 3 mg; cobalamin, 0.02 mg; calcium-D-pantothenate, 10 mg; nicotinic acid, 50 mg; folic acid, 1 mg; and biotin, 0.15 mg. ME: Metabolic Energy. CP: Crude protein.

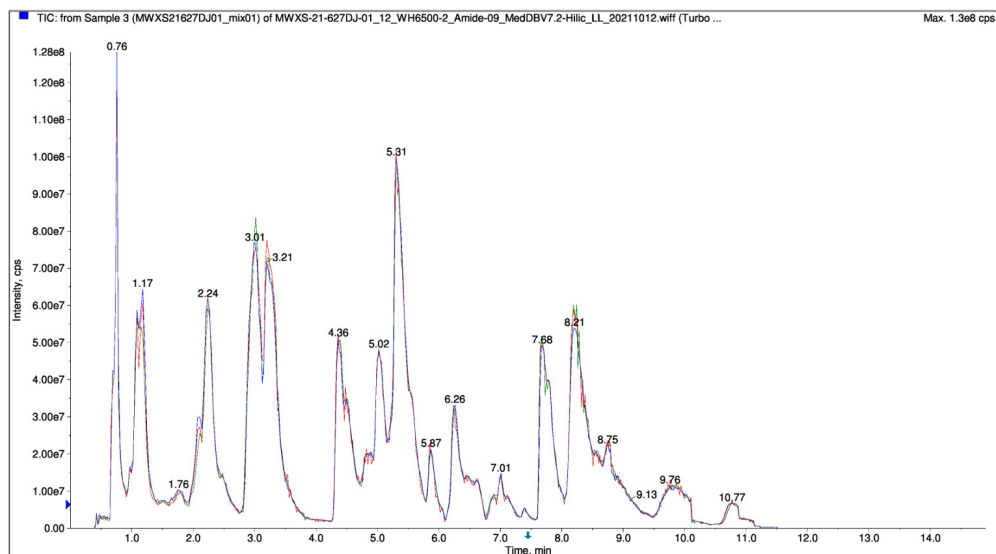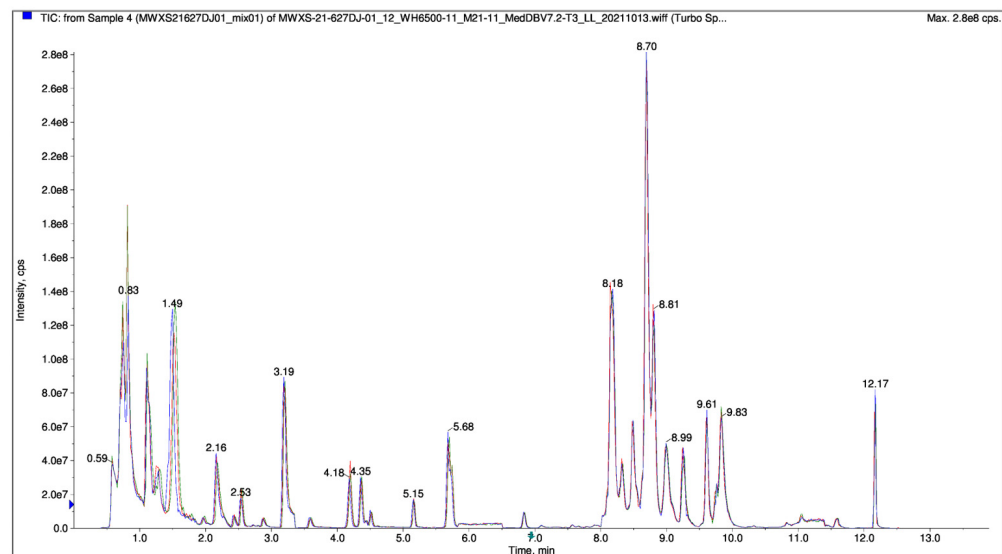

**Figure S1:** TIC overlap detected by essential spectrum of QC sample.
